# Supplementary material for: Candidate pathogenicity islands in the genome of ‘ Candidatus Rickettsiella isopodorum’, an intracellular bacterium infecting terrestrial isopod crustaceans
Source: PeerJ journal article supplement (doi:10.7717/peerj.2806), 2016-12-21
Supplement: Supplement.zip [file Supplement.zip]

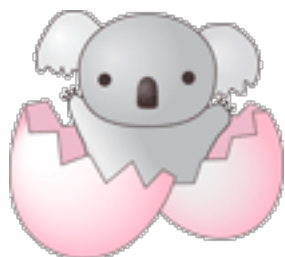

# BlastKOALA

## Result

### Your BlastKOALA job

Query dataset: 1284 entries

Taxonomy group: Prokaryotes,Bacteria,Gammaproteobacteria (Taxonomy ID: 59195)

KEGG database searched: family\_eukaryotes.pep,genus\_prokaryotes.pep

Job submitted: Wed Oct 26 04:37:53 JST 2016

Job completed: Wed Oct 26 05:27:10 JST 2016

Help

### Annotation data [View](#) | [Download](#)

Summary 865 entries (67.4%) annotated

Functional  
category

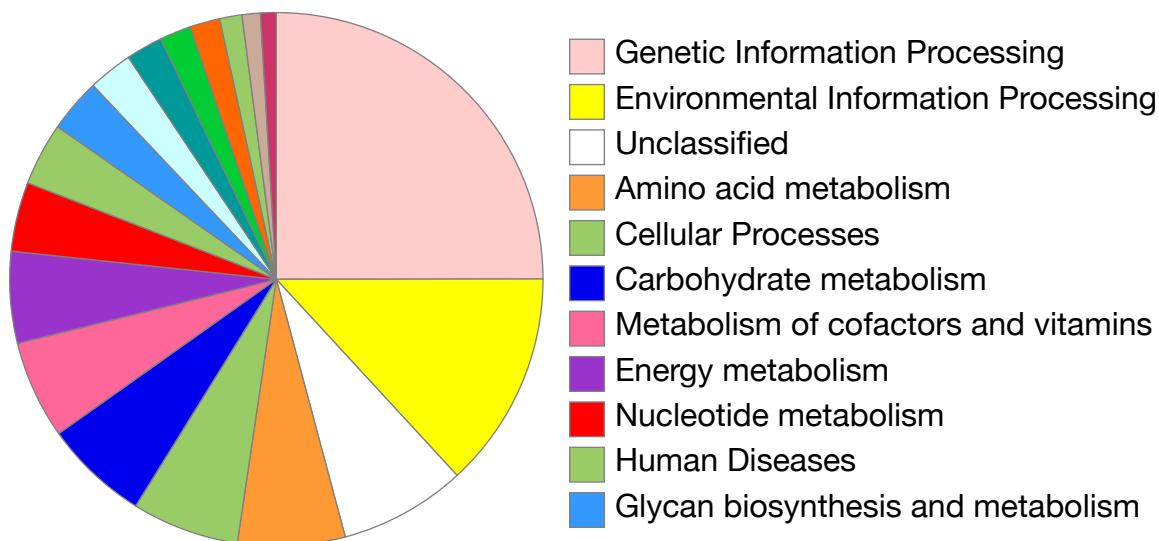

[See color codes](#)

### KEGG Mapper

[Reconstruct Pathway](#)  
[Reconstruct Brite](#)  
[Reconstruct Module](#)
