# Supplementary material for: Candidate pathogenicity islands in the genome of ‘ Candidatus Rickettsiella isopodorum’, an intracellular bacterium infecting terrestrial isopod crustaceans
Source: PeerJ journal article supplement (doi:10.7717/peerj.2806), 2016-12-21
Supplement: Supplement.zip [file Supplement.zip]

# Module Reconstruction Result

[Show all objects](#)

## Pathway module

### Energy metabolism

Carbon fixation

[M00166](#) Reductive pentose phosphate cycle, ribulose-5P => glyceraldehyde-3P [PATH:[map01200](#) [map00710](#)] (2) (2 blocks missing)

[M00167](#) Reductive pentose phosphate cycle, glyceraldehyde-3P => ribulose-5P [PATH:[map01200](#) [map00710](#)] (5) (2 blocks missing)

[M00168](#) CAM (Crassulacean acid metabolism), dark [PATH:[map01200](#) [map00710](#)] (1) (1 block missing)

Methane metabolism

[M00345](#) Formaldehyde assimilation, ribulose monophosphate pathway [PATH:[map01200](#) [map00680](#)] (1) (2 blocks missing)

### Carbohydrate and lipid metabolism

Central carbohydrate metabolism

[M00001](#) Glycolysis (Embden-Meyerhof pathway), glucose => pyruvate [PATH:[map01200](#) [map00010](#)] (10) (1 block missing)

[M00002](#) Glycolysis, core module involving three-carbon compounds [PATH:[map01200](#) [map01230](#) [map00010](#)] (7) (complete)

[M00003](#) Gluconeogenesis, oxaloacetate => fructose-6P [PATH:[map00010](#) [map00020](#)] (8) (1 block missing)

[M00307](#) Pyruvate oxidation, pyruvate => acetyl-CoA [PATH:[map01200](#) [map00010](#) [map00020](#) [map00620](#)] (6) (complete)

[M00009](#) Citrate cycle (TCA cycle, Krebs cycle) [PATH:[map01200](#) [map00020](#)] (15) (complete)

[M00010](#) Citrate cycle, first carbon oxidation, oxaloacetate => 2-oxoglutarate [PATH:[map01200](#) [map01210](#) [map01230](#) [map00020](#)] (4) (complete)

[M00011](#) Citrate cycle, second carbon oxidation, 2-oxoglutarate => oxaloacetate [PATH:[map01200](#) [map00020](#)] (11) (complete)

[M00007](#) Pentose phosphate pathway, non-oxidative phase, fructose 6P => ribose 5P [PATH:[map01200](#) [map01230](#) [map00030](#)] (3) (1 block missing)

[M00580](#) Pentose phosphate pathway, archaea, fructose 6P => ribose 5P [PATH:[map01200](#) [map01230](#) [map00030](#)] (1) (1 block missing)

[M00005](#) PRPP biosynthesis, ribose 5P => PRPP [PATH:[map01200](#) [map01230](#) [map00030](#) [map00230](#)] (1) (complete)

[M00308](#) Semi-phosphorylative Entner-Doudoroff pathway, gluconate => glycerate-3P [PATH:[map01200](#) [map00030](#)] (4) (1 block missing)

Other carbohydrate metabolism

[M00012](#) Glyoxylate cycle [PATH:[map01200](#) [map00630](#)] (4) (2 blocks missing)

[M00632](#) Galactose degradation, Leloir pathway, galactose => alpha-D-glucose-1P [PATH:[map00052](#)] (2) (2 blocks missing)

[M00061](#) D-Glucuronate degradation [PATH:[map00040](#) [map00030](#)] (3) (2 blocks missing)

[M00549](#) Nucleotide sugar biosynthesis, glucose => UDP-glucose [PATH:[map00520](#)] (1) (2 blocks missing)

[M00793](#) dTDP-L-rhamnose biosynthesis [PATH:[map00521](#) [map00523](#)] (4) (complete)

Fatty acid metabolism

[M00082](#) Fatty acid biosynthesis, initiation [PATH:[map01212](#) [map00061](#)] (6) (complete)

[M00083](#) Fatty acid biosynthesis, elongation [PATH:[map01212](#) [map00061](#)] (5) (complete)

[M00086](#) beta-Oxidation, acyl-CoA synthesis [PATH:[map01212](#) [map00071](#)] (1) (complete)

[M00087](#) beta-Oxidation [PATH:[map01212](#) [map00071](#)] (2) (1 block missing)

Lipid metabolism

[M00093](#) Phosphatidylethanolamine (PE) biosynthesis, PA => PS => PE [PATH:[map00564](#)] (3) (complete)

Lipopolysaccharide metabolism

[M00060](#) Lipopolysaccharide biosynthesis, KDO2-lipid A [PATH:[map00540](#)] (8) (1 block missing)

[M00063](#) CMP-KDO biosynthesis [PATH:[map00540](#)] (3) (1 block missing)

M00064 ADP-L-glycero-D-manno-heptose biosynthesis [PATH:map00540] (4) (complete)

Terpenoid backbone biosynthesis

M00096 C5 isoprenoid biosynthesis, non-mevalonate pathway [PATH:map00900] (7) (1 block missing)

M00364 C10-C20 isoprenoid biosynthesis, bacteria [PATH:map00900] (1) (1 block missing)

## Nucleotide and amino acid metabolism

Purine metabolism

M00049 Adenine ribonucleotide biosynthesis, IMP => ADP,ATP [PATH:map00230] (5) (complete)

M00050 Guanine ribonucleotide biosynthesis IMP => GDP,GTP [PATH:map00230] (5) (complete)

Pyrimidine metabolism

M00051 Uridine monophosphate biosynthesis, glutamine (+ PRPP) => UMP [PATH:map00240] (8) (1 block missing)

M00052 Pyrimidine ribonucleotide biosynthesis, UMP => UDP/UTP,CDP/CTP [PATH:map00240] (3) (complete)

M00053 Pyrimidine deoxyribonucleotide biosynthesis, CDP/CTP => dCDP/dCTP,dTDP/dTTP [PATH:map00240] (8) (1 block missing)

Cysteine and methionine metabolism

M00338 Cysteine biosynthesis, homocysteine + serine => cysteine [PATH:map01230 map00270] (2) (complete)

M00035 Methionine degradation [PATH:map00270] (3) (1 block missing)

M00368 Ethylene biosynthesis, methionine => ethylene [PATH:map00270] (1) (2 blocks missing)

Lysine metabolism

M00016 Lysine biosynthesis, succinyl-DAP pathway, aspartate => lysine [PATH:map01230 map00300] (8) (1 block missing)

M00526 Lysine biosynthesis, DAP dehydrogenase pathway, aspartate => lysine [PATH:map01230 map00300] (5) (1 block missing)

M00527 Lysine biosynthesis, DAP aminotransferase pathway, aspartate => lysine [PATH:map01230 map00300] (6) (1 block missing)

Arginine and proline metabolism

M00015 Proline biosynthesis, glutamate => proline [PATH:map01230 map00330] (1) (1 block missing)

Other amino acid metabolism

M00027 GABA (gamma-Aminobutyrate) shunt [PATH:map00250] (1) (2 blocks missing)

Cofactor and vitamin biosynthesis

M00127 Thiamine biosynthesis, AIR => thiamine-P/thiamine-2P [PATH:map00730] (4) (1 block missing)

M00125 Riboflavin biosynthesis, GTP => riboflavin/FMN/FAD [PATH:map00740] (6) (complete)

M00120 Coenzyme A biosynthesis, pantothenate => CoA [PATH:map00770] (4) (complete)

M00572 Pimeloyl-ACP biosynthesis, BioC-BioH pathway, malonyl-ACP => pimeloyl-ACP [PATH:map00780] (5) (1 block missing)

M00123 Biotin biosynthesis, pimeloyl-ACP/CoA => biotin [PATH:map00780] (4) (complete)

M00573 Biotin biosynthesis, BioI pathway, long-chain-acyl-ACP => pimeloyl-ACP => biotin [PATH:map00780] (4) (1 block missing)

M00577 Biotin biosynthesis, BioW pathway, pimelate => pimeloyl-CoA => biotin [PATH:map00780] (4) (1 block missing)

M00126 Tetrahydrofolate biosynthesis, GTP => THF [PATH:map00790 map00670] (5) (2 blocks missing)

M00121 Heme biosynthesis, glutamate => protoheme/siroheme [PATH:map00860] (12) (2 blocks missing)

M00118 Glutathione biosynthesis, glutamate => glutathione [PATH:map00480] (2) (complete)

M00140 C1-unit interconversion, prokaryotes [PATH:map00670] (2) (1 block missing)

M00141 C1-unit interconversion, eukaryotes [PATH:map00670] (1) (1 block missing)

Polyamine biosynthesis

M00134 Polyamine biosynthesis, arginine => ornithine => putrescine [PATH:map00330] (2) (complete)

## Structural complex

### Energy metabolism

ATP synthesis

M00144 NADH:quinone oxidoreductase, prokaryotes [PATH:map00190] (15) (complete)

M00149 Succinate dehydrogenase, prokaryotes [PATH:map00190] (4) (complete)

M00151 Cytochrome bc1 complex respiratory unit [PATH:map00190] (3) (complete)

M00152 Cytochrome bc1 complex [PATH:map00190] (3) (1 block missing)

- M00154 Cytochrome c oxidase [PATH:map00190] (2) (1 block missing)
- M00155 Cytochrome c oxidase, prokaryotes [PATH:map00190] (3) (complete)
- M00153 Cytochrome d ubiquinol oxidase [PATH:map00190] (2) (complete)
- M00157 F-type ATPase, prokaryotes and chloroplasts [PATH:map00190 map00195] (8) (complete)

## Genetic information processing

### DNA polymerase

- M00260 DNA polymerase III complex, bacteria [PATH:map03030 map03430 map03440] [BR:ko03032 ko03400] (7) (complete)

### RNA polymerase

- M00183 RNA polymerase, bacteria [PATH:map03020] [BR:ko03021 ko03400] (4) (complete)

### RNA processing

- M00394 RNA degradosome [PATH:map03018] (3) (1 block missing)

### Ribosome

- M00178 Ribosome, bacteria [PATH:map03010] [BR:ko03011] (53) (complete)
- M00179 Ribosome, archaea [PATH:map03010] [BR:ko03011] (31) (1 block missing)

## Environmental information processing

### Mineral and organic ion transport system

- M00188 NitT/TauT family transport system [BR:ko02000] (2) (1 block missing)
- M00299 Spermidine/putrescine transport system [PATH:map02010] [BR:ko02000] (4) (complete)
- M00442 Putative hydroxymethylpyrimidine transport system [PATH:map02010] [BR:ko02000] (3) (complete)

### Saccharide, polyol, and lipid transport system

- M00669 gamma-Hexachlorocyclohexane transport system [BR:ko02000] (7) (complete)
- M00210 Phospholipid transport system [PATH:map02010] [BR:ko02000] (8) (complete)
- M00670 Mce transport system [BR:ko02000] (6) (1 block missing)

### Phosphate and amino acid transport system

- M00238 D-Methionine transport system [PATH:map02010] [BR:ko02000] (3) (complete)

### Metallic cation, iron-siderophore and vitamin B12 transport system

- M00244 Putative zinc/manganese transport system [BR:ko02000] (3) (complete)

### ABC-2 type and other transport systems

- M00250 Lipopolysaccharide transport system [PATH:map02010] [BR:ko02000] (2) (complete)
- M00320 Lipopolysaccharide export system [PATH:map02010] [BR:ko02000] (3) (complete)
- M00255 Lipoprotein-releasing system [PATH:map02010] [BR:ko02000] (2) (complete)
- M00259 Heme transport system [PATH:map02010] [BR:ko02000] (3) (complete)
- M00254 ABC-2 type transport system [BR:ko02000] (2) (complete)

### Drug efflux transporter/pump

- M00720 Multidrug resistance, efflux pump VexEF-TolC (1) (1 block missing)

### Bacterial secretion system

- M00325 alpha-Hemolysin/cyclolysin transport system [PATH:map02010 map03070] [BR:ko02044] (1) (1 block missing)
- M00326 RTX toxin transport system [BR:ko02044] (1) (1 block missing)
- M00571 AlgE-type Mannuronan C-5-Epimerase transport system [BR:ko02044] (1) (1 block missing)
- M00339 RaxAB-RaxC type I secretion system [PATH:map04626] [BR:ko02044] (1) (1 block missing)
- M00331 Type II general secretion system [PATH:map03070] [BR:ko02044] (1) (1 block missing)
- M00333 Type IV secretion system [PATH:map03070] [BR:ko02044] (1) (1 block missing)
- M00335 Sec (secretion) system [PATH:map03070] [BR:ko02044] (11) (complete)
- M00429 Competence-related DNA transformation transporter [BR:ko02044] (2) (1 block missing)

## Functional set

### Metabolism

#### Aminoacyl tRNA

- M00360 Aminoacyl-tRNA biosynthesis, prokaryotes [PATH:map00970] (20) (complete)
- M00359 Aminoacyl-tRNA biosynthesis, eukaryotes [PATH:map00970] (20) (2 blocks missing)

#### Nucleotide sugar

- M00362 Nucleotide sugar biosynthesis, prokaryotes [PATH:map00520] (5) (2 blocks missing)
- M00361 Nucleotide sugar biosynthesis, eukaryotes [PATH:map00520] (4) (2 blocks missing)

### Environmental information processing

#### Two-component regulatory system

- M00453 QseC-QseB (quorum sensing) two-component regulatory system [PATH:map02020] [BR:ko02022] (3) (complete)

M00475 BarA-UvrY (central carbon metabolism) two-component regulatory system [PATH:[map02020](#)]  
[BR:[ko02022](#)] (1) (1 block missing)  
Drug efflux transporter/pump  
M00647 Multidrug resistance, efflux pump AcrAB-TolC/SmeDEF (5) (1 block missing)  
M00699 Multidrug resistance, efflux pump AmeABC (4) (2 blocks missing)  
Drug resistance  
M00628 beta-Lactam resistance, AmpC system [PATH:[map01501](#)] (2) (2 blocks missing)  
M00742 Aminoglycoside resistance, protease FtsH (4) (complete)  
M00743 Aminoglycoside resistance, protease HtpX (1) (2 blocks missing)  
M00729 Fluoroquinolone resistance, gyrase-protecting protein Qnr (1) (2 blocks missing)  
M00721 Cationic antimicrobial peptide (CAMP) resistance, *arnBCADTEF* operon [PATH:[map01503](#)] (1) (2 blocks missing)  
M00728 Cationic antimicrobial peptide (CAMP) resistance, envelope protein folding and degrading factors DegP and DsbA [PATH:[map01503](#)] (1) (2 blocks missing)

## Signature module

### Gene set

Drug resistance  
M00651 Vancomycin resistance, D-Ala-D-Lac type [PATH:[map01502](#) [map02020](#)] (1) (2 blocks missing)  
M00718 Multidrug resistance, efflux pump MexAB-OprM (4) (2 blocks missing)  
M00696 Multidrug resistance, efflux pump AcrEF-TolC (1) (2 blocks missing)  
M00697 Multidrug resistance, efflux pump MdtEF-TolC (1) (2 blocks missing)
