# Supplementary figures and images for: Candidate pathogenicity islands in the genome of ‘ Candidatus Rickettsiella isopodorum’, an intracellular bacterium infecting terrestrial isopod crustaceans
Source: PeerJ journal article supplement (doi:10.7717/peerj.2806), 2016-12-21

*Rickettsiella grylli*

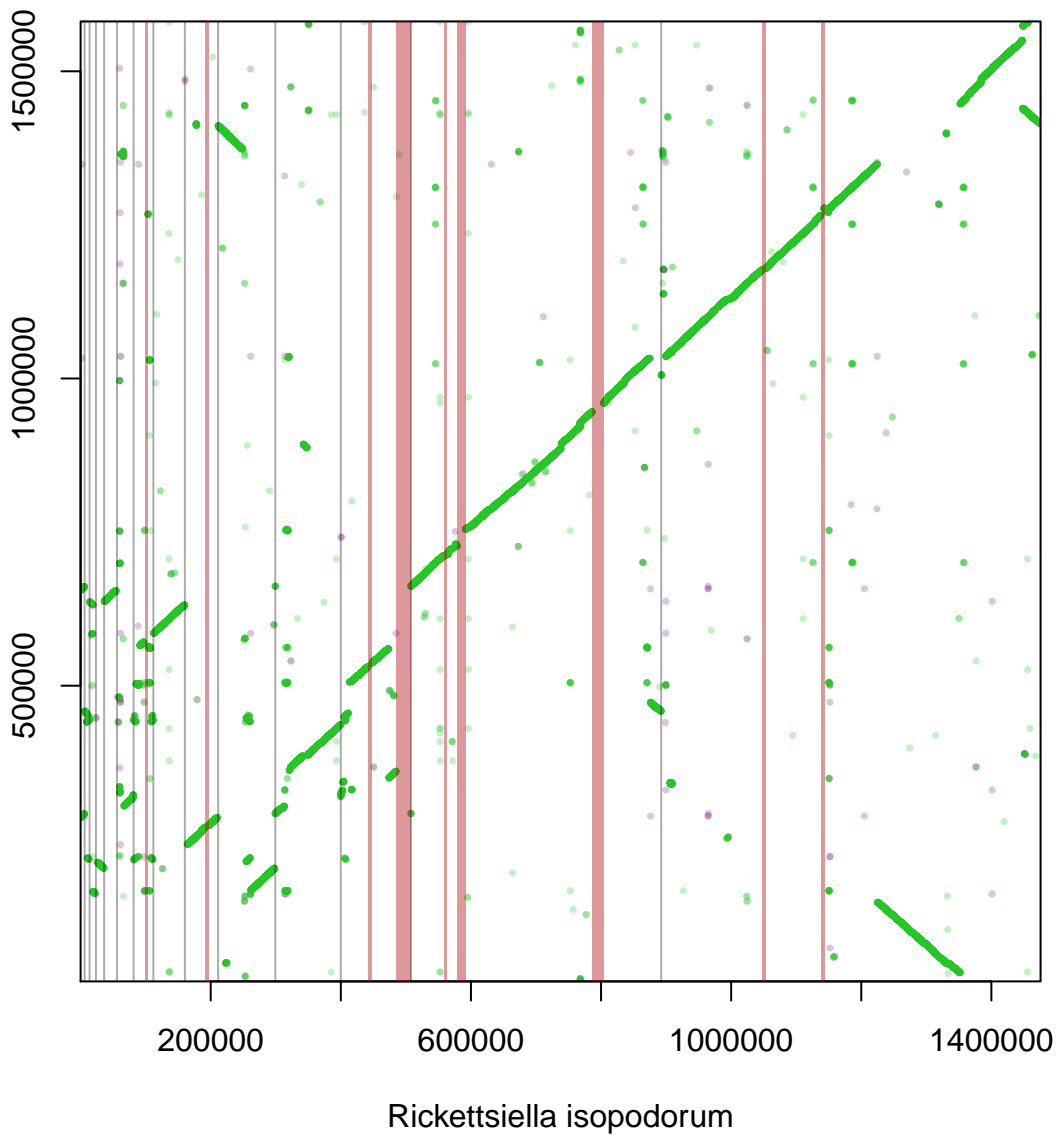

*Rickettsiella isopodorum*

Supplement: Supplement.zip [file Supplement.zip]

*Diplorickettsia massiliensis*

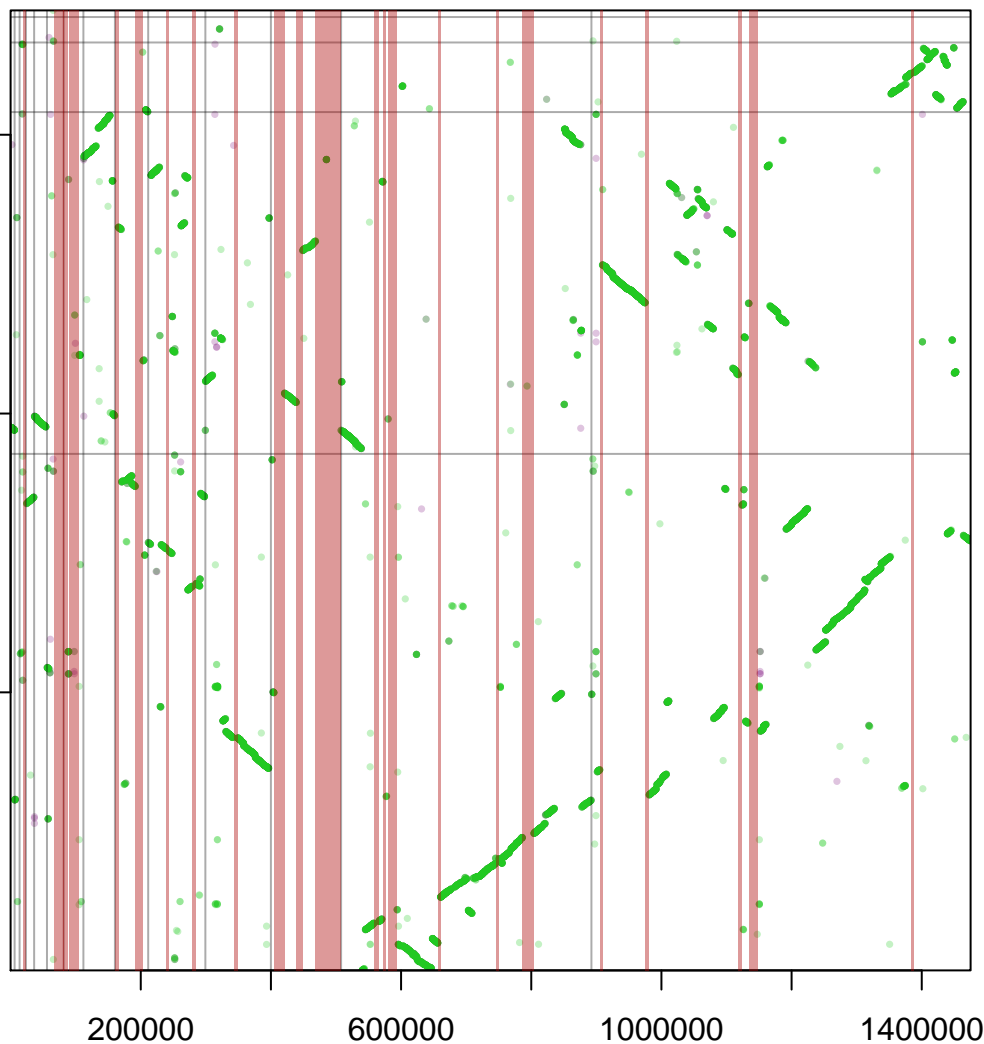

*Rickettsiella isopodorum*

Supplement: Supplement.zip [file Supplement.zip]

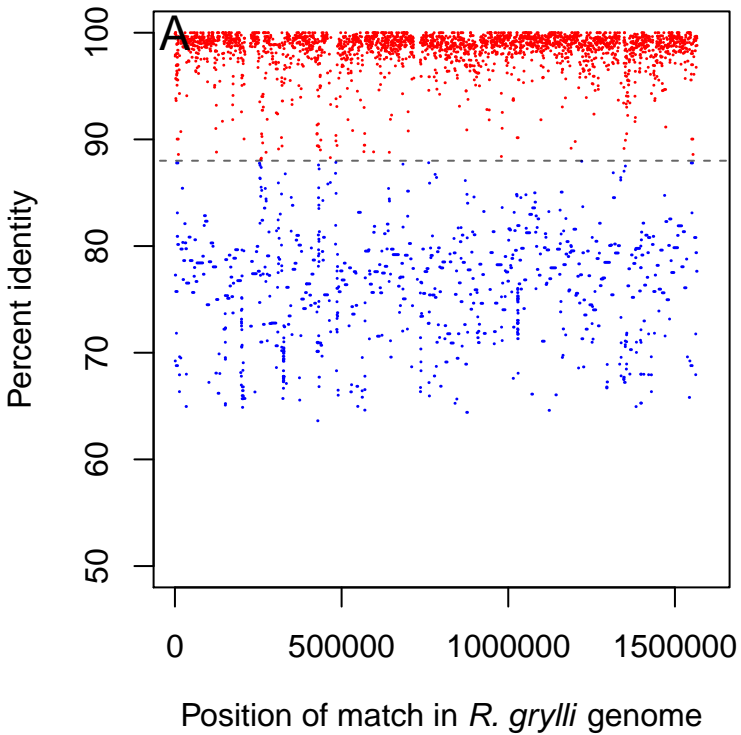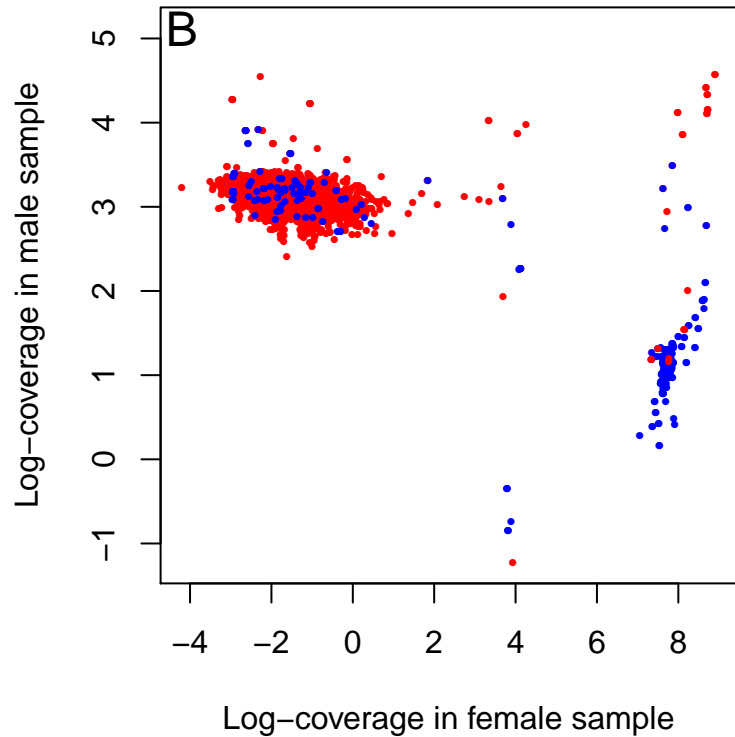

Supplement: Supplement.zip [file Supplement.zip]
